# Supplementary material
Source: MDPI journal article supplement (https://www.mdpi.com/2313-0105/9/12/574)
Supplement: s1 [file s1]

## Supplementary materials

# Selective Precipitation of Rare Earth Double Sulfate Salts from Industrial Ni–MH Battery Leachates: Impact of Downstream Processing on Product Quality

Boris Guzhov <sup>1</sup>, Laurent Cassayre <sup>1,\*</sup>, Antoine Barnabé <sup>2</sup>, Nicolas Coppey <sup>3</sup>, Béatrice Biscans <sup>1</sup>

<sup>1</sup> Laboratoire de Génie Chimique, Université de Toulouse, CNRS, INP, UPS, Toulouse, France

<sup>2</sup> CIRIMAT, Université de Toulouse, UPS, CNRS, INP, Toulouse, France

<sup>3</sup> Société Nouvelle d’Affinage des Métaux (SNAM Groupe), Viviez

\* Correspondence: laurent.cassayre@ensiacet.fr

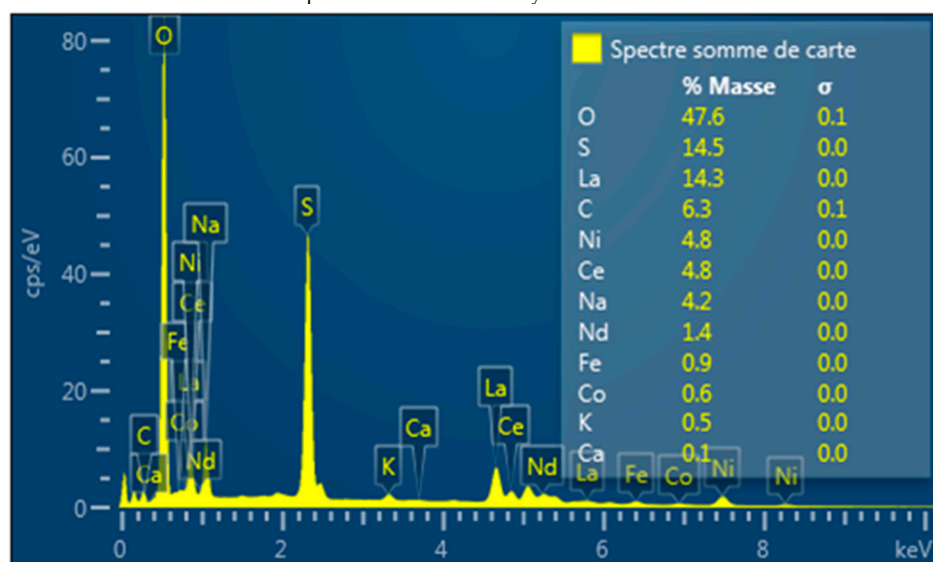

Figure S1. EDS spectrum of non-washed sample.

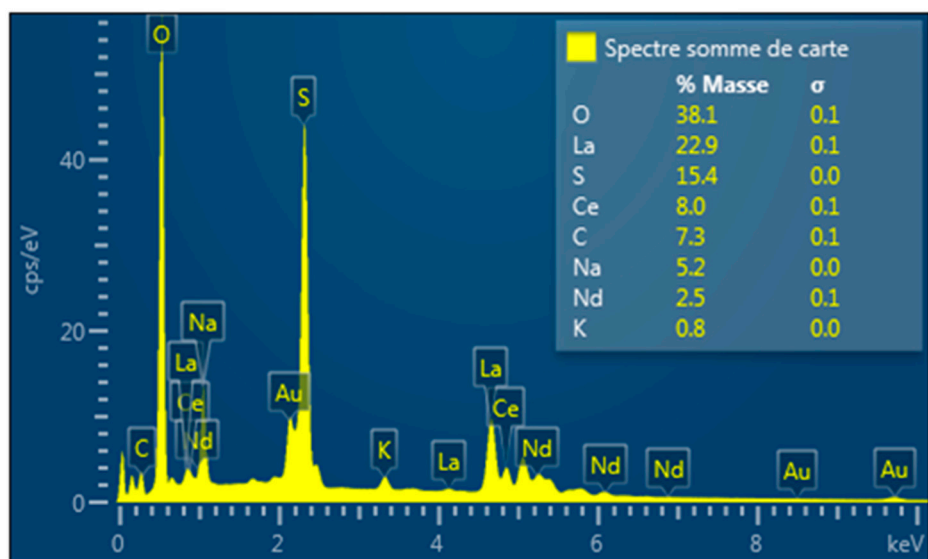

Figure S2 EDS spectrum of washed sample.
